# Supplementary material for: Targeting Inhibition of Accumulation and Function of Myeloid-Derived Suppressor Cells by Artemisinin via PI3K/AKT, mTOR, and MAPK Pathways Enhances Anti-PD-L1 Immunotherapy in Melanoma and Liver Tumors
Source: PubMed Central journal article supplement (PMC9247850; doi:10.1155/2022/2253436), 2022-06-22

A

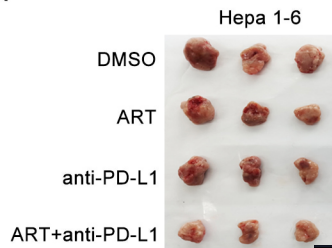

B

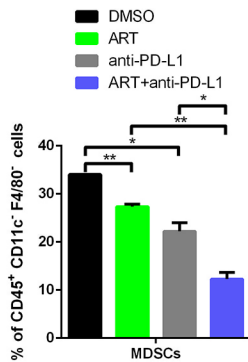

C

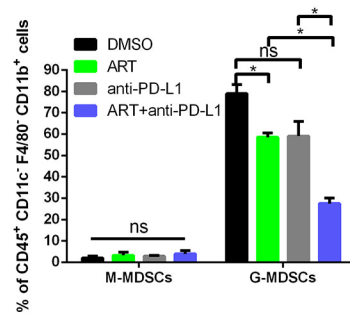

D

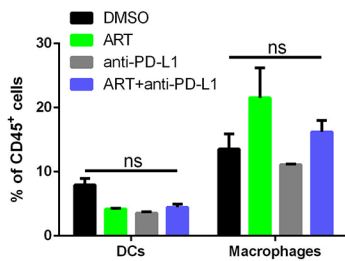

E

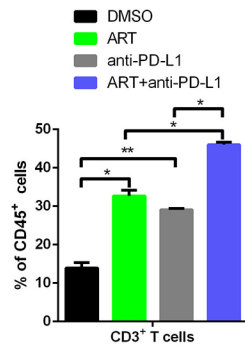

F

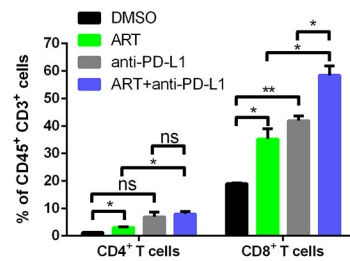

G

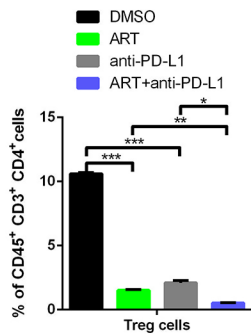

H

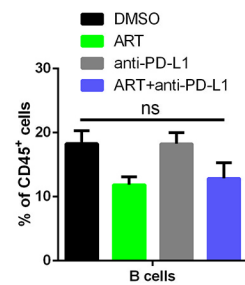

I

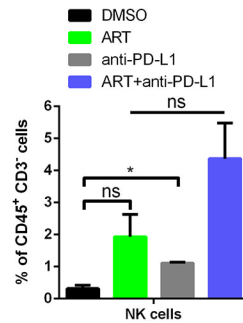

Supplement: 2253436.f5.pdf [file 2253436.f5.pdf]
