# Supplementary material for: Targeting Inhibition of Accumulation and Function of Myeloid-Derived Suppressor Cells by Artemisinin via PI3K/AKT, mTOR, and MAPK Pathways Enhances Anti-PD-L1 Immunotherapy in Melanoma and Liver Tumors
Source: Hindawi journal article supplement (doi:10.1155/2022/2253436), 2022-06-22

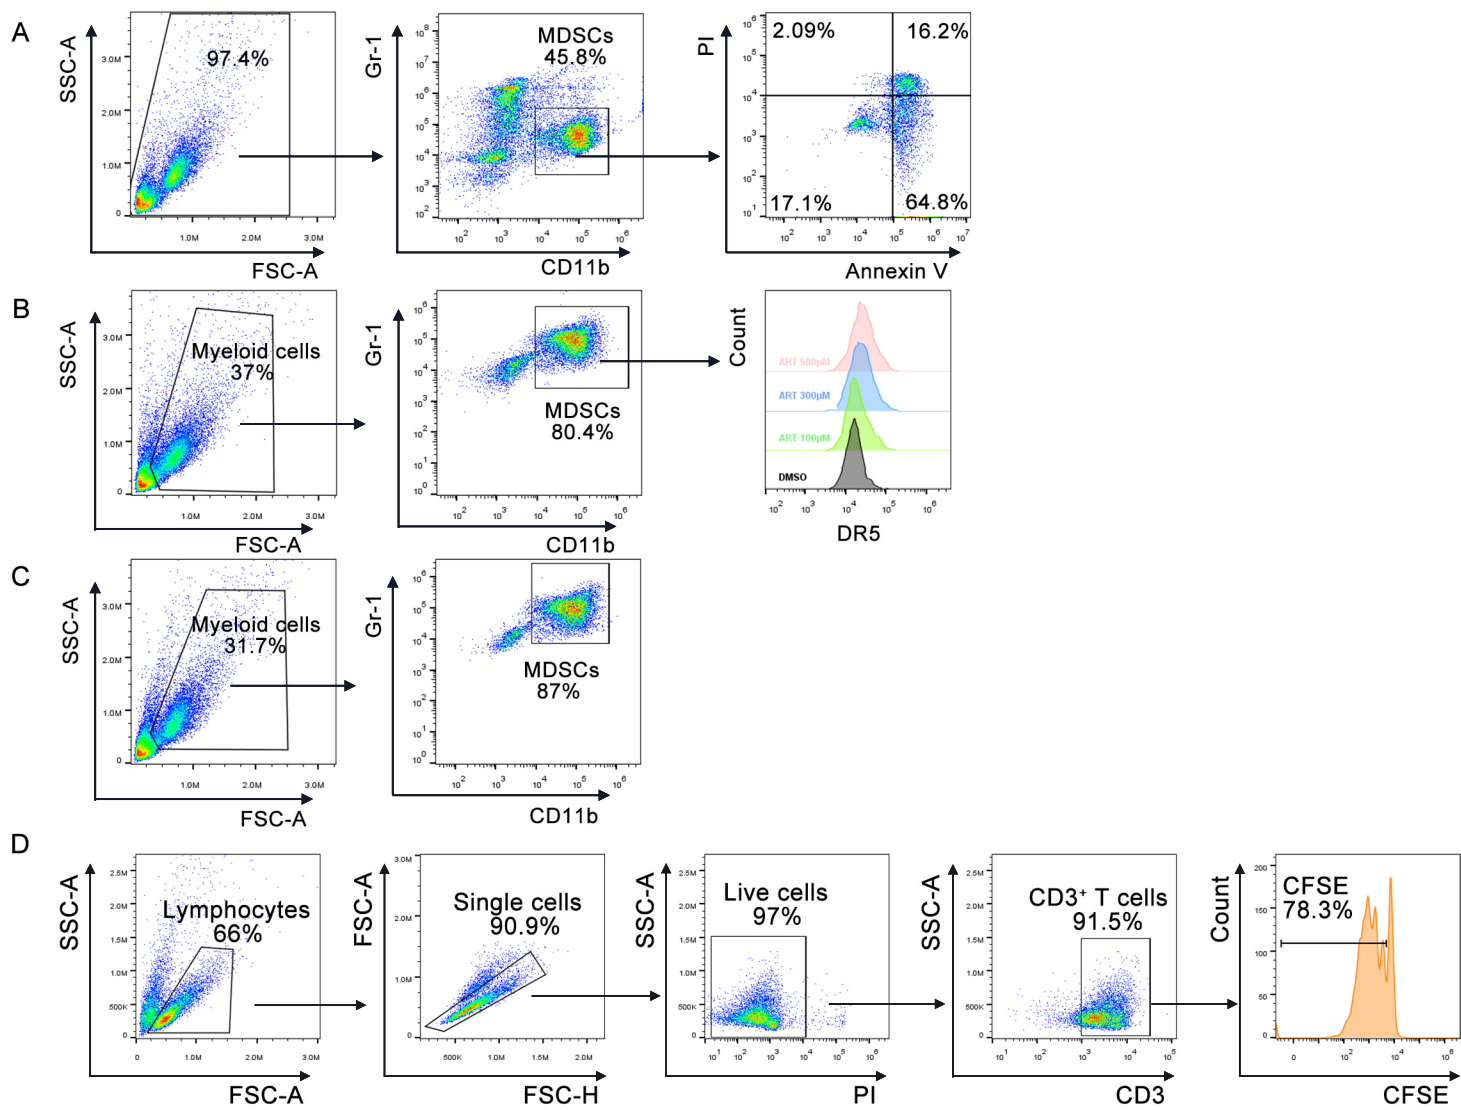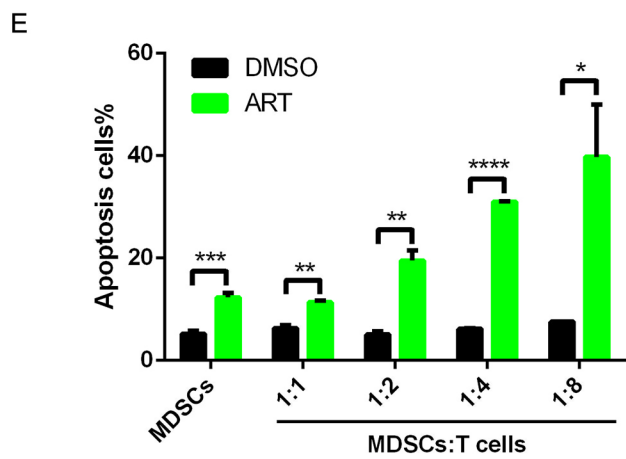

Supplement: f1 [file 2253436.f1.pdf]
