# Supplementary material for: Targeting Inhibition of Accumulation and Function of Myeloid-Derived Suppressor Cells by Artemisinin via PI3K/AKT, mTOR, and MAPK Pathways Enhances Anti-PD-L1 Immunotherapy in Melanoma and Liver Tumors
Source: Hindawi journal article supplement (doi:10.1155/2022/2253436), 2022-06-22
Supplement: f6 [file 2253436.f6.pdf]

| Family                | Gene name(Foverd-F and Reverse-R) | Species | Primer sequence(5'-3')    |
|-----------------------|-----------------------------------|---------|---------------------------|
| MDSC function factors | <i>Arg1-F</i>                     | mouse   | ATTATCGGAGCGCCTTTCTC      |
|                       | <i>Arg1-R</i>                     | mouse   | ACAGACCGTGGGTTCTTCAC      |
|                       | <i>Inos-F</i>                     | mouse   | CACCTTGGAAGAGGAGCAAC      |
|                       | <i>Inos-R</i>                     | mouse   | AAGGCCAAACACAGCATACC      |
|                       | <i>P47<sup>phox</sup>-F</i>       | mouse   | CCACACTGCTGGACTTCTT       |
|                       | <i>P47<sup>phox</sup>-R</i>       | mouse   | GCCACGGTCATCTCTGTTC       |
|                       | <i>Gp91<sup>phox</sup>-F</i>      | mouse   | AACTGGGCTGTGAATGAAGG      |
|                       | <i>Gp91<sup>phox</sup>-R</i>      | mouse   | CAGTGCTGACCCAAGGAGTT      |
|                       | <i>P22<sup>phox</sup>-F</i>       | mouse   | GTGGCTACTGCTGGACGTTT      |
|                       | <i>P22<sup>phox</sup>-R</i>       | mouse   | TGGACCCCTTTTCTCTTT        |
|                       | <i>P67<sup>phox</sup>-F</i>       | mouse   | AAACTCAGACGCCAGTAAGCA     |
|                       | <i>P67<sup>phox</sup>-R</i>       | mouse   | CCAGCCATTCTTCATTCACA      |
|                       | <i>P40<sup>phox</sup>-F</i>       | mouse   | GACACAGGCAAAACCATCAA      |
|                       | <i>P40<sup>phox</sup>-R</i>       | mouse   | ACAGCAGCCTAACCAAGTCC      |
|                       | <i>Rac1-F</i>                     | mouse   | GCTGACTCCCATCACCTACC      |
|                       | <i>Rac1-R</i>                     | mouse   | TCGGATAGCTTCGTCAAACA      |
|                       | <i>S100a8-F</i>                   | mouse   | GGAAATCACCATGCCCTCT       |
|                       | <i>S100a8-R</i>                   | mouse   | TTTATCACCATCGCAAGGAAC     |
|                       | <i>S100a9-F</i>                   | mouse   | AATGGTGAAGCACAGTTGG       |
|                       | <i>S100a9-R</i>                   | mouse   | GCTGATTGCTCTGGTTTGTG      |
|                       | <i>Il6-F</i>                      | mouse   | TAGTCCTTCTACCCCAATTTCC    |
|                       | <i>Il6-R</i>                      | mouse   | TTGGTCCTTAGCCACTCCTTC     |
|                       | <i>Il4ra-F</i>                    | mouse   | CCTCACACTCCACCAATG        |
|                       | <i>Il4ra-R</i>                    | mouse   | AGCCTGGGTTCCCTGTAGGT      |
|                       | <i>Il10-F</i>                     | mouse   | GAAGACCCTCAGGATGCGG       |
|                       | <i>Il10-R</i>                     | mouse   | ACCTGCTCCACTGCCTTGCT      |
|                       | <i>Tnfa-F</i>                     | mouse   | CATCTTGTCAAATTCGAGTGACAA  |
|                       | <i>Tnfa-R</i>                     | mouse   | TGGGAGTAGACAAGGTACAACCC   |
|                       | <i>Tgfb1-F</i>                    | mouse   | CGCTGCTACTGCAAGTCAGA      |
|                       | <i>Tgfb1-R</i>                    | mouse   | GGTAGCGATCGAGTGTCCA       |
|                       | <i>Il10r2-F</i>                   | mouse   | TTTGTCTGCTGTGGCTCAT       |
|                       | <i>Il10r2-R</i>                   | mouse   | AGGGAAGGAGAACAGCAGAA      |
|                       | <i>Il10r1-F</i>                   | mouse   | CCCATTCTCGTCACGATCTC      |
|                       | <i>Il10r1-R</i>                   | mouse   | TCAGACTGGTTTGGGATAGGTTT   |
|                       | <i>Il12p40-F</i>                  | mouse   | AGGTCACACTGGACCAAGG       |
|                       | <i>Il12p40-R</i>                  | mouse   | AGGGTACTCCAGCTGACCT       |
|                       | <i>Il6ra-F</i>                    | mouse   | CCTGTGTGGGTTCCAGAGGAT     |
|                       | <i>Il6ra-R</i>                    | mouse   | CTGCCAGTATTCTCAGCAGCTG    |
|                       | <i>Il1a-F</i>                     | mouse   | TCTCAGATTCACAACCTGTTCTGTG |
|                       | <i>Il1a-R</i>                     | mouse   | AGAAAATGAGGTCGGTCTCACTA   |
